1 **An online tool for correcting verification bias when validating electronic phenotyping**  
2 **algorithms.**

3 Ajay Bhasin, MD<sup>1,2</sup>; Suzette J. Bielinski, PhD, MEd<sup>3</sup> Abel N. Kho, MD<sup>4,5</sup>; Nicholas B. Larson  
4 PhD, MS\*<sup>6</sup>; Laura Rasmussen-Torvik, MPH, PhD\*<sup>7</sup>

5 <sup>1</sup>Department of Medicine, Division of Hospital Medicine, Northwestern University Feinberg  
6 School of Medicine, Chicago, IL

7 <sup>2</sup>Department of Pediatrics, Division of Hospital-Based Medicine, Northwestern University  
8 Feinberg School of Medicine, Chicago, IL

9 <sup>3</sup>Division of Epidemiology, Department of Quantitative Health Sciences, Mayo Clinic College of  
10 Medicine and Science, Rochester, Minnesota, USA

11 <sup>4</sup>Center for Health Information Partnerships, Institute for Public Health & Medicine, Feinberg  
12 School of Medicine, Northwestern University, Chicago, IL, USA.

13 <sup>5</sup>Division of General Internal Medicine, Department of Medicine, Feinberg School of Medicine,  
14 Northwestern University, Chicago, IL, USA.

15 <sup>6</sup>Division of Clinical Trials and Biostatistics, Department of Quantitative Health Sciences, Mayo  
16 Clinic College of Medicine and Science, Rochester, MN, USA

17 <sup>7</sup>Department of Preventive Medicine, Division of Epidemiology, Northwestern University  
18 Feinberg School of Medicine

19 \*These authors contributed equally

20 Abstract word Count: 153

21 **Word count:** 1293

22 **Tables:** 2

23 **Conflict of Interest Disclosures:** To the best of our knowledge, no conflict of interest, financial  
24 or other, exists with respect to the information provided in this report.

25 **Funding/Support:** None.

26 **Address for Correspondence:**

27 Ajay Bhasin, MD; Assistant Professor; Department of Medicine and Department of Pediatrics;  
28 Northwestern University Feinberg School of Medicine

29 Address: 257 E Huron, Suite 16-738, Chicago, IL 60611

30 Email: [ajay.bhasin@nm.org](mailto:ajay.bhasin@nm.org)

31 ORCID: 0000-0001-5577-2065 | Twitter: @Ajaybhasin19 | Phone: (312) 926-5893

32 **Abstract**

33 Computable or electronic phenotypes of patient conditions are becoming more commonplace in  
34 quality improvement and clinical research. During phenotyping algorithm validation, standard  
35 classification performance measures (i.e., sensitivity, specificity, positive predictive value,  
36 negative predictive value, and accuracy) are commonly employed. When validation is  
37 performed on a randomly sampled patient population, direct estimates of these measures are  
38 valid. However, it is common that studies will sample patients conditional on the algorithm  
39 result, leading to a form of bias known as verification bias. The presence of verification bias  
40 requires adjustment of performance measure estimates to account for this sampling bias. Herein,  
41 we describe the appropriate formulae for valid estimates of sensitivity, specificity, and accuracy  
42 to account for verification bias. We additionally present an online tool to adjust algorithm  
43 performance measures for verification bias by directly taking the sampling strategy into  
44 consideration and recommend use of this tool to properly estimate algorithm performance for  
45 phenotyping validation studies.

## 46 **Introduction**

47 Computable phenotypes of patient conditions are becoming more commonplace in quality  
48 improvement and clinical research.<sup>1</sup> These phenotypes are algorithmically derived from data  
49 sources such as electronic health record (EHR), insurance claims, or centers for Medicare and  
50 Medicaid Services data, and can empower research and improve patient care.<sup>2,3</sup> Algorithm  
51 performance measures, such as sensitivity, specificity, and positive and negative predictive  
52 values (PPV and NPV) are common measures of validity obtained by comparing the algorithm  
53 result to a “gold standard” (e.g. manual chart review). A common validation study design  
54 strategy when the condition of interest has low prevalence is to sample based on the algorithm  
55 result (e.g. 50 predicted cases and 50 predicted non-cases).<sup>4,5</sup> This strategy is both cost-effective  
56 and statistically efficient by enriching for likely true positives and improving the expected  
57 precision of positive-class performance measures (e.g., sensitivity, PPV). However, this  
58 sampling strategy also results in a form of selection bias known as verification bias, which is  
59 commonly encountered in diagnostic test evaluation.<sup>6-8</sup> Under these conditions, estimates of  
60 sensitivity, specificity, and accuracy can be biased if the sampling design is not taken into  
61 consideration. Herein, we illustrate the effects of verification bias on performance estimation  
62 through an example validation study and develop a user-friendly online tool to facilitate  
63 adjustment of performance measures under these validation study scenarios.

## 64 **Methods**

65 Given that EHR-based phenotyping algorithms can be prone to error, it is often of interest to  
66 characterize classification performance relative to ground truth based on manual chart  
67 abstraction. Formulae for defining these performance measures adjusting estimates of sensitivity  
68 and specificity for verification bias are available in Figure 1. Detailed explanations of these

69 derivations, along with formulae for calculating corresponding asymptotic CI's, are provided by Begg and  
70 Greenes.<sup>9</sup>

71

### 72 *Validation Study Sampling Design*

73 For phenotyping algorithms, the total number of patients with available classification results  
74 tends to be very large due to ease of implementation (e.g., the entire patient population at a  
75 medical institution). Given the potential laborious nature of chart review, algorithm validation  
76 studies are often performed on a relatively small subset of the total population. When the  
77 expected prevalence of the disease condition is low (i.e., less than 10%), validation studies may  
78 have correspondingly low precision for estimating sensitivity and PPV if patients are randomly  
79 sampled from the population. For example, for a disease with prevalence of 2%, in a random  
80 sample of 500 patients we expect 10 positive disease patients, on average. Even at a true  
81 algorithm sensitivity of 90% (i.e., 9/10 cases correctly identified), the Wilson score 95%  
82 confidence interval (CI) would be [0.596,0.995]. In contrast, 90% specificity would correspond  
83 to a 95% confidence interval of [0.870,0.925]. This disparity in precision can be mitigated by  
84 oversampling subjects predicted by the algorithm as a positive case (e.g., 1:1 sampling based on  
85 predicted disease status), leading to a more balanced representation of true disease cases and  
86 unaffected non-cases within the validation sample.

### 87 *Naïve and Adjusted Validation Performance*

88 While the sampling strategy defined above leads to more statistically efficient estimation of  
89 algorithm performance, sampling patients for the validation study based on algorithm-classified  
90 disease status can lead to biased estimation of performance measures. Referred to as

91 “verification” or “work-up” bias, unadjusted analyses of the resulting validation 2x2 contingency  
92 table can specifically lead to overestimated sensitivity while simultaneously underestimating  
93 specificity. However, since NPV and PPV correspond to probabilities conditional on predicted  
94 statuses, these estimates remain valid under this conditional sampling scheme.

### 95 *Example Validation Study*

96 Consider the illustrative example of a validation study where a phenotyping algorithm is  
97 applied to a source population of 1,100 patients, corresponding to 100 patients classified as  
98 positive and 1000 patients as negative. From this cohort, 50 predicted cases and 50 predicted  
99 non-cases were selected for phenotyping algorithm validation. The manual abstraction yielded a  
100 2x2 contingency table with counts of 49 true positives, 1 false positive, 3 false negatives, and 47  
101 true negatives.

### 102 *Simulation Analysis*

103 To further illustrate the impact of verification bias on sensitivity and specificity estimates across  
104 a broad range of realistic study conditions, we conducted a simple simulation study for a disease  
105 with estimated true prevalence between 1% and 50%; true NPV of 0.90, 0.95, and 0.99; and true  
106 PPV of 0.70, 0.80, and 0.90. For validation, we considered a balanced study design, such that  
107 equal numbers of predicted cases and non-cases are selected for chart abstraction. We then  
108 calculated the expected bias of naive estimates of sensitivity and specificity relative to  
109 appropriately adjusted estimates based on expected values of true positive rate (TPR), false  
110 positive rate (FPR), true negative rate (TNR), and false negative rate (FNR) in the validation  
111 study.

### 112 *Online Tool*

113 We used Microsoft Visual Studio Code (version 1.78.0) and Python (version 3.10) with the  
114 *Streamlit* package (version 1.13.0) to create a simple tool to calculate sensitivity, specificity,  
115 PPV, NPV, and accuracy of a phenotyping algorithm based on chart validation. The tool is  
116 freely available at: <https://bit.ly/3tMTJiE>.

## 117 **Results**

118 The 2x2 contingency table of the example validation study along with projected counts from the  
119 total source cohort are presented in Table 1, while respective performance measure analyses  
120 corresponding to unadjusted and verification-bias adjusted estimates are presented in Table 2.  
121 Unadjusted performance estimates for the hypothesized phenotyping algorithm corresponded to  
122 0.942 sensitivity, 0.979 specificity, and 0.960 accuracy. The disease prevalence in the validation  
123 study sample was 0.520, whereas the true prevalence in the source population was 0.091. After  
124 adjusting for verification bias, the updated performance measures for the algorithm corresponded  
125 to 0.620 sensitivity, 0.999 specificity, and 0.944 accuracy.

126 Results from our simulation study are presented in Figure 2. These results illustrate the  
127 substantial positive bias for sensitivity estimation that may be observed as disease prevalence  
128 decreases toward zero when analyzing the unadjusted validation study confusion matrix results.  
129 This bias relationship is attenuated as the NPV approaches 1.00, but still yields extreme bias at  
130 lower prevalence values. For specificity (Figure 2B), we observe similar trends of increased  
131 absolute bias with decreased prevalence. However, the magnitude of this bias remains largely  
132 consistent across realistically high values of NPV considered for the simulation study, with lower  
133 PPV leading to moderate increases in bias. Of note, these results represented expected biases,  
134 and actual results may vary based on sizes of the total population and sampling cohort due to  
135 sampling variability.

136 **Discussion**

137           The provided example demonstrates the performance metrics of an algorithm and how  
138 much they can change when one does not randomly sample from the source population for  
139 algorithm validation. Oversampling of algorithm-positive cases for validation can bias model  
140 performance measures, leading to inflated sensitivity and accuracy estimates. The bias can be  
141 mitigated by considering the prevalence of disease in the source population and adjusting the  
142 calculations to account for the difference.

143           While sampling conditional on predicted disease status will lead to valid direct estimates  
144 of PPV and NPV, these measures are themselves a function of disease prevalence. Thus, they  
145 are not necessarily intrinsic properties of a phenotyping algorithm, and should be interpreted  
146 with caution as disease prevalence may vary across validation populations.<sup>10</sup> Likewise,  
147 alternative performance measures that are in part functions of sensitivity and/or specificity, such  
148 as F1-score and positive/negative likelihood ratios, will also likely be biased and require similar  
149 corrections. Stratified study designs can also be adopted when there are covariates that may  
150 correlate with differential algorithm performance, and we refer the reader to appropriate  
151 references for how to address adjustment under these conditions.<sup>6,9</sup>

152           For accurate adjustment and algorithm calibration, the source population should be  
153 defined prior to application of an algorithm. Ideally, a very high percentage of the source  
154 population will be characterized by the algorithm: if a high percentage of patients are not  
155 classified as either disease positive or negative by the algorithm, then the performance metrics of  
156 the algorithm will be difficult to interpret and this will significantly increase the difficulty of  
157 cross-institutional validation.<sup>11-13</sup>

158 This tool will enable clinicians, informaticists, and data scientists to appropriately  
159 characterize performance of computable phenotype algorithms.

160 **References:**

- 161 1. Richesson RL, Smerek MM, Blake Cameron C. A Framework to Support the Sharing and Reuse of  
162 Computable Phenotype Definitions Across Health Care Delivery and Clinical Research Applications.  
163 EGEMS (Wash DC) 2016;4:1232.
- 164 2. Bielinski SJ, Pathak J, Carrell DS, et al. A Robust e-Epidemiology Tool in Phenotyping Heart  
165 Failure with Differentiation for Preserved and Reduced Ejection Fraction: the Electronic Medical Records  
166 and Genomics (eMERGE) Network. *J Cardiovasc Transl Res* 2015;8:475-83.
- 167 3. Carroll RJ, Thompson WK, Eyler AE, et al. Portability of an algorithm to identify rheumatoid  
168 arthritis in electronic health records. *J Am Med Inform Assoc* 2012;19:e162-9.
- 169 4. Jackson KL, Mbagwu M, Pacheco JA, et al. Performance of an electronic health record-based  
170 phenotype algorithm to identify community associated methicillin-resistant *Staphylococcus aureus* cases  
171 and controls for genetic association studies. *BMC Infect Dis* 2016;16:684.
- 172 5. Kho AN, Hayes MG, Rasmussen-Torvik L, et al. Use of diverse electronic medical record systems  
173 to identify genetic risk for type 2 diabetes within a genome-wide association study. *J Am Med Inform*  
174 *Assoc* 2012;19:212-8.
- 175 6. Gaffikin L, McGrath J, Arbyn M, Blumenthal PD. Avoiding verification bias in screening test  
176 evaluation in resource poor settings: a case study from Zimbabwe. *Clin Trials* 2008;5:496-503.
- 177 7. O'Sullivan JW, Banerjee A, Heneghan C, Pluddemann A. Verification bias. *BMJ Evid Based Med*  
178 2018;23:54-5.
- 179 8. Hall MK, Kea B, Wang R. Recognising Bias in Studies of Diagnostic Tests Part 1: Patient Selection.  
180 *Emerg Med J* 2019;36:431-4.
- 181 9. Begg CB, Greenes RA. Assessment of diagnostic tests when disease verification is subject to  
182 selection bias. *Biometrics* 1983;39:207-15.
- 183 10. Grunau G, Linn S. Commentary: Sensitivity, Specificity, and Predictive Values: Foundations,  
184 Pliabilities, and Pitfalls in Research and Practice. *Front Public Health* 2018;6:256.
- 185 11. Rasmussen-Torvik LJ, Furmanchuk A, Stoddard AJ, et al. The effect of number of healthcare visits  
186 on study sample selection in electronic health record data. *Int J Popul Data Sci* 2020;5.
- 187 12. Newton KM, Peissig PL, Kho AN, et al. Validation of electronic medical record-based  
188 phenotyping algorithms: results and lessons learned from the eMERGE network. *J Am Med Inform Assoc*  
189 2013;20:e147-54.
- 190 13. Desai JR, Wu P, Nichols GA, Lieu TA, O'Connor PJ. Diabetes and asthma case identification,  
191 validation, and representativeness when using electronic health data to construct registries for  
192 comparative effectiveness and epidemiologic research. *Med Care* 2012;50 Suppl:S30-5.

193

194



195 **Tables**

196 **Table 1:** 2x2 contingency table definitions for phenotyping validation.

|                      | <b>Validation Study</b> |                  |              | <b>Source Population</b> |                   |              |
|----------------------|-------------------------|------------------|--------------|--------------------------|-------------------|--------------|
|                      | <b>Chart (+)</b>        | <b>Chart (-)</b> | <b>Total</b> | <b>Disease</b>           | <b>No Disease</b> | <b>Total</b> |
| <b>Algorithm (+)</b> | 49                      | 1                | 50           | 98                       | 2                 | 100          |
| <b>Algorithm (-)</b> | 3                       | 47               | 50           | 60                       | 940               | 1000         |
| <b>Total</b>         | 52                      | 48               | 100          | 158                      | 942               | 1100         |

197

198

199 **Table 2:** Comparison of classification performance measures based on unadjusted analysis of the  
200 validation study table and verification bias adjusted estimates. Note that PPV and NPV are  
201 identical across both analyses.

| <b>Measures</b>             | <b>Naïve</b> |               | <b>Bias-Adjusted</b> |               |
|-----------------------------|--------------|---------------|----------------------|---------------|
| <b>Prevalence</b>           | 0.520        |               | 0.091                |               |
| <b>Accuracy</b>             | 0.960        |               | 0.944                |               |
| <b>PPV (95% CI)</b>         | 0.980        | [0.895,0.999] | -                    | -             |
| <b>NPV (95% CI)</b>         | 0.940        | [0.838,0.979] | -                    | -             |
| <b>Sensitivity (95% CI)</b> | 0.942        | [0.844,0.980] | 0.620                | [0.553,0.683] |
| <b>Specificity (95% CI)</b> | 0.979        | [0.891,0.999] | 0.998                | [0.997,0.998] |

202

203

204 **Figures**

205 **Figure 1.**

206

207 **A. Mathematical definition of performance measures:**

208 **Five primary performance measures of interest:**

209

$$\begin{aligned} \text{Sensitivity} &= \frac{TP}{TP + FN} = \Pr(X = 1|Y = 1) \\ \text{Specificity} &= \frac{TN}{TN + FP} = \Pr(X = 0|Y = 0) \\ \text{PPV} &= \frac{TP}{TP + FP} = \Pr(Y = 1|X = 1) \\ \text{NPV} &= \frac{TN}{TN + FN} = \Pr(Y = 0|X = 0) \\ \text{Accuracy} &= \frac{TN + TP}{TN + TP + FP + FN} = \Pr(X = Y) \end{aligned}$$

210

211 **Additional measures of interest:**

$$\begin{aligned} \text{True disease prevalence } d &= \frac{TP+FN}{N} = \Pr(Y = 1) \\ \text{Test positive rate } \tau^+ &= \frac{TP+FP}{N} = \Pr(X = 1) \\ \text{Test negative rate } \tau^- &= \Pr(X = 0) = 1 - \tau^+. \end{aligned}$$

212

213 **Expected rates of TPR, TNR, FPR, and FNR in the source cohort**

|                                   |                                         |
|-----------------------------------|-----------------------------------------|
| $TPR = PPV \times \tau^+$         | $FPR = (1 - PPV) \times \tau^+$         |
| $TP = N \times PPV \times \tau^+$ | $FP = N \times (1 - PPV) \times \tau^+$ |
| $TNR = NPV \times \tau^-$         | $FNR = (1 - NPV) \times \tau^-$         |
| $TN = N \times NPV \times \tau^-$ | $FN = N \times (1 - NPV) \times \tau^-$ |

214

215

216

217 **b) Adjusted estimates of sensitivity and specificity correcting for verification bias**

$$\begin{aligned} \text{Sensitivity}^{adj} &= \frac{TPR}{TPR + FNR} = \frac{PPV \times \tau^+}{PPV \times \tau^+ + (1 - NPV) \times \tau^-} \\ \text{Specificity}^{adj} &= \frac{TNR}{TNR + FPR} = \frac{NPV \times \tau^-}{NPV \times \tau^- + (1 - PPV) \times \tau^+} \end{aligned}$$

218

219

220 **Legend**

221 Consider a phenotyping algorithm for predicting the presence of a given disease condition based on a  
222 patient's EHR data. We designate  $Y \in \{0,1\}$  to be the true underlying disease status for a given patient  
223 and  $X \in \{0,1\}$  to be the predicted disease status by the algorithm, such that 0 and 1 respectively denote  
224 unaffected and affected disease statuses. For disease phenotyping on a patient cohort of size  $N$ , the  
225 classification results can be summarized using a standard 2x2 contingency table, which tabulates patient  
226 classifications of disease relative to true disease status into four distinct categories: true positives (TP),  
227 true negatives (TN), false positives (FP), and false negatives (FN), as indicated in Table 1. Counts in the  
228 equations above can be replaced by corresponding rates by simply factoring out  $N$  (e.g., the true positive  
229 rate  $TPR = \frac{TP}{N} = \Pr(Y = 1, X = 1)$ ). Given that unbiased estimates of test positive and negative rates,  
230  $\tau^+$  and  $\tau^-$ , are available from the algorithm classifications for the original source cohort, the expected  
231 rates of TPR, TNR, FPR, and FNR in the source cohort can actually be calculated as simple functions of  
232 these parameters and the PPV and NPV estimates from the validation study. For example, recall from  
233 above that TPR can be framed as the joint probability  $\Pr(Y = 1, X = 1)$ . Since  $\Pr(Y = 1, X = 1) =$   
234  $\Pr(Y = 1|X = 1) \times \Pr(X = 1)$  by basic rules of conditional probability, and  $\Pr(Y = 1|X = 1) = PPV$   
235 and  $\Pr(X = 1) = \tau^+$  per our definitions above, it follows that  $TPR = PPV \times \tau^+$

236

237 **Figure 2:** Simulation study results demonstrating expected biases for sensitivity and specificity  
238 under verification bias for various values of true PPV, true NPV, and disease prevalence.

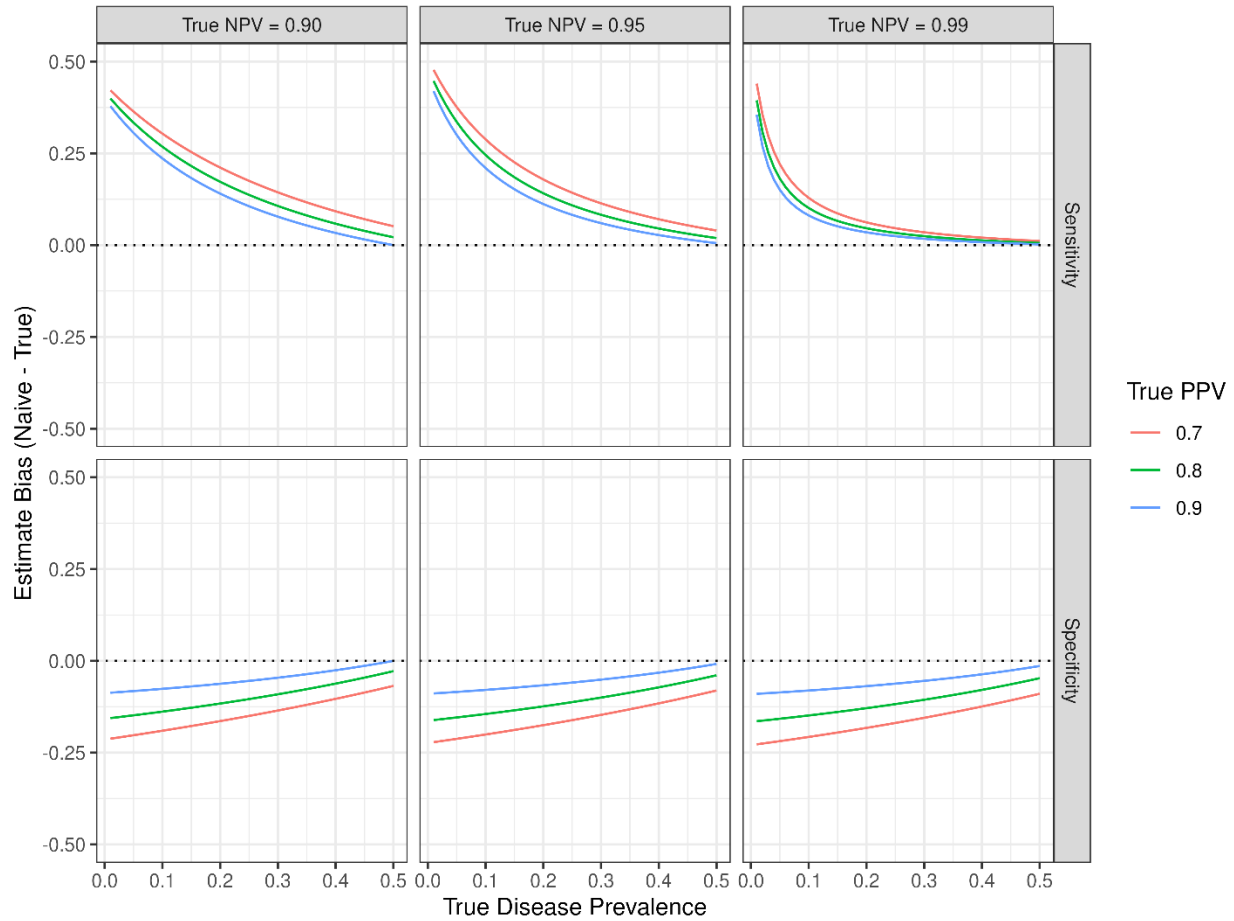

239
